# Supplementary material for: Increases in alcohol consumption in women and elderly groups: evidence from an epidemiological study
Source: PubMed Central journal article supplement (PMC3720280; doi:10.1186/1471-2458-13-207), 2013-03-08
Supplement: 1471-2458-13-207-S1.pdf [file 1471-2458-13-207-S1.pdf]

Table A1 Prevalence/distribution or mean and standard deviation of alcohol use indicators, by age and sex, in unweighted subjects

|                                            | Age 18-25      |                  | Age 25-35    |                  | Age 35-45     |                   | Age 45-55      |                   | Age 55-65       |                   | Age 65 or older |                 |
|--------------------------------------------|----------------|------------------|--------------|------------------|---------------|-------------------|----------------|-------------------|-----------------|-------------------|-----------------|-----------------|
|                                            | Men<br>N=1,235 | Women<br>N=2,499 | Men<br>N=839 | Women<br>N=1,769 | Men<br>N= 995 | Women<br>N= 1,891 | Men<br>N=1,192 | Women<br>N= 2,265 | Men<br>N= 1,255 | Women<br>N= 1,507 | Men<br>N= 536   | Women<br>N= 604 |
|                                            | %              | %                | %            | %                | %             | %                 | %              | %                 | %               | %                 | %               | %               |
| <i>Alcohol initiation (N=16,239)</i>       |                |                  |              |                  |               |                   |                |                   |                 |                   |                 |                 |
| No                                         | 2.6            | 3.6              | 1.6          | 3.8              | 2.2           | 4.8               | 2.8            | 4.5               | 2.0             | 6.0               | 2.9             | 14.3            |
| A few times to try                         | 4.4            | 7.0              | 3.1          | 7.0              | 4.2           | 8.5               | 1.9            | 6.8               | 1.6             | 5.7               | 2.5             | 8.7             |
| Yes                                        | 93.0           | 89.4             | 95.4         | 89.2             | 93.6          | 86.7              | 95.3           | 88.7              | 96.3            | 88.3              | 94.7            | 77.0            |
| <i>Frequency of alcohol use (N=15,321)</i> |                |                  |              |                  |               |                   |                |                   |                 |                   |                 |                 |
| Never                                      | 3.5            | 6.0              | 3.9          | 12.9             | 4.3           | 11.4              | 3.9            | 9.0               | 2.9             | 9.0               | 6.9             | 10.0            |
| Monthly or less                            | 12.2           | 28.0             | 13.2         | 33.4             | 15.9          | 29.2              | 9.2            | 19.5              | 8.7             | 17.0              | 10.1            | 17.7            |
| 2-4 times a month                          | 36.1           | 42.9             | 35.2         | 29.3             | 27.7          | 26.2              | 21.4           | 20.8              | 14.8            | 17.2              | 16.6            | 14.6            |
| 2-3 times a week                           | 36.2           | 20.1             | 34.2         | 17.5             | 29.8          | 19.5              | 29.8           | 23.3              | 24.5            | 19.9              | 16.8            | 21.2            |
| 4-5 times a week                           | 7.8            | 2.4              | 8.4          | 4.6              | 11.3          | 7.8               | 15.6           | 11.7              | 17.1            | 13.5              | 16.0            | 12.6            |
| 6-7 times a week                           | 4.2            | .6               | 5.0          | 2.4              | 11.0          | 6.0               | 20.1           | 15.7              | 32.1            | 23.4              | 33.7            | 23.9            |
| <i>Weekly alcohol quantity (N=13,026)</i>  |                |                  |              |                  |               |                   |                |                   |                 |                   |                 |                 |
| 3 glasses or less                          | 21.5           | 39.3             | 23.3         | 51.8             | 25.3          | 46.5              | 20.1           | 34.8              | 14.3            | 28.9              | 17.5            | 30.7            |
| 4-7 glasses                                | 18.6           | 29.2             | 28.6         | 28.7             | 29.2          | 30.0              | 24.6           | 32.1              | 23.1            | 29.4              | 28.5            | 29.6            |
| 8-14 glasses                               | 25.0           | 19.9             | 28.4         | 13.9             | 26.0          | 17.7              | 31.6           | 22.7              | 29.5            | 26.3              | 26.4            | 25.4            |
| 15-21 glasses                              | 16.7           | 6.4              | 10.1         | 3.0              | 11.9          | 3.4               | 13.8           | 7.7               | 18.9            | 10.6              | 15.1            | 11.3            |
| More than 21 glasses                       | 18.2           | 5.2              | 9.7          | 2.6              | 7.7           | 2.5               | 9.9            | 2.7               | 14.3            | 4.9               | 12.5            | 3.1             |
| <i>Preferred beverage (N=14,482)</i>       |                |                  |              |                  |               |                   |                |                   |                 |                   |                 |                 |
| Wine                                       | 3.2            | 39.9             | 16.7         | 60.4             | 26.1          | 68.1              | 34.3           | 80.7              | 39.4            | 82.6              | 46.3            | 85.3            |
| Beer                                       | 72.3           | 14.4             | 62.9         | 10.9             | 50.7          | 8.4               | 46.9           | 5.3               | 40.6            | 3.9               | 25.8            | 2.3             |
| Strong drinks                              | 11.5           | 27.4             | 7.1          | 16.9             | 7.1           | 12.7              | 6.8            | 5.0               | 8.2             | 5.1               | 12.7            | 4.5             |
| No preference                              | 13.1           | 18.3             | 13.3         | 11.8             | 16.2          | 10.8              | 12.1           | 9.0               | 11.8            | 8.4               | 15.2            | 7.9             |
| <i>Urges to drink alcohol</i>              |                |                  |              |                  |               |                   |                |                   |                 |                   |                 |                 |
| <i>Social situations (N=15,115)</i>        |                |                  |              |                  |               |                   |                |                   |                 |                   |                 |                 |
| No                                         | 17.4           | 20.7             | 10.7         | 20.9             | 16.5          | 25.4              | 18.1           | 29.3              | 20.3            | 32.0              | 32.2            | 35.9            |
| Mild                                       | 53.3           | 59.3             | 55.1         | 57.5             | 57.0          | 57.8              | 63.4           | 58.4              | 66.4            | 59.1              | 60.4            | 58.3            |
| Strong                                     | 29.3           | 20.1             | 34.2         | 21.6             | 26.5          | 16.8              | 18.5           | 12.3              | 13.2            | 8.9               | 7.5             | 5.8             |
| <i>At dinner (N=15,038)</i>                |                |                  |              |                  |               |                   |                |                   |                 |                   |                 |                 |
| No                                         | 70.6           | 77.5             | 60.0         | 65.5             | 61.7          | 66.3              | 61.8           | 63.2              | 53.9            | 54.8              | 47.7            | 45.6            |
| Mild                                       | 28.3           | 21.1             | 36.6         | 30.6             | 34.1          | 29.2              | 33.6           | 32.2              | 40.3            | 40.6              | 46.2            | 51.0            |
| Strong                                     | 1.0            | 1.5              | 3.4          | 3.9              | 4.2           | 4.5               | 4.6            | 4.6               | 5.8             | 4.6               | 6.1             | 3.3             |
| <i>After work (N=14,892)</i>               |                |                  |              |                  |               |                   |                |                   |                 |                   |                 |                 |
| No                                         | 66.3           | 90.8             | 77.1         | 89.3             | 81.0          | 90.5              | 81.3           | 87.1              | 72.8            | 80.9              | 78.0            | 82.2            |
| Mild                                       | 26.8           | 8.4              | 20.1         | 9.0              | 16.7          | 7.6               | 15.3           | 10.1              | 22.8            | 15.6              | 18.5            | 16.4            |
| Strong                                     | 6.9            | .8               | 2.8          | 1.7              | 2.3           | 1.9               | 3.5            | 2.9               | 4.4             | 3.5               | 3.5             | 1.4             |

|                                                   |        | Age 18-25     |               | Age 25-35     |               | Age 35-45     |               | Age 45-55     |               | Age 55-65     |                | Age 65 or older |                |
|---------------------------------------------------|--------|---------------|---------------|---------------|---------------|---------------|---------------|---------------|---------------|---------------|----------------|-----------------|----------------|
|                                                   |        | Men           | Women         | Men           | Women         | Men           | Women         | Men           | Women         | Men           | Women          | Men             | Women          |
|                                                   |        | N=1,235       | N=2,499       | N=839         | N=1,769       | N= 995        | N= 1,891      | N=1,192       | N= 2,265      | N= 1,255      | N= 1,507       | N= 536          | N= 604         |
|                                                   |        | %             | %             | %             | %             | %             | %             | %             | %             | %             | %              | %               | %              |
| <i>Relaxing (N=15,056)</i>                        | No     | 36.4          | 52.8          | 40.2          | 52.7          | 40.5          | 51.7          | 29.5          | 41.8          | 25.9          | 40.6           | 36.8            | 38.1           |
|                                                   | Mild   | 51.9          | 42.2          | 51.6          | 43.1          | 48.9          | 42.5          | 61.9          | 52.3          | 66.7          | 53.6           | 59.5            | 58.6           |
|                                                   | Strong | 11.7          | 4.9           | 8.2           | 4.2           | 10.6          | 5.8           | 8.6           | 5.8           | 7.3           | 5.8            | 3.7             | 3.3            |
| <i>Concentrating (N=14,735)</i>                   | No     | 97.0          | 98.5          | 98.1          | 99.0          | 97.6          | 99.1          | 97.5          | 99.0          | 96.2          | 96.5           | 93.5            | 96.3           |
|                                                   | Mild   | 2.8           | 1.5           | 1.8           | .9            | 2.2           | .8            | 2.3           | .9            | 3.5           | 3.3            | 6.3             | 3.7            |
|                                                   | Strong | .2            | 0             | .1            | .1            | .2            | .1            | .2            | .1            | .3            | .2             | .2              | 0              |
| <i>Under stress (N=14,775)</i>                    | No     | 79.9          | 84.1          | 80.3          | 83.9          | 82.1          | 82.6          | 78.2          | 77.6          | 72.9          | 73.0           | 75.1            | 73.4           |
|                                                   | Mild   | 16.2          | 13.3          | 16.1          | 12.8          | 15.4          | 14.2          | 17.8          | 18.1          | 21.8          | 21.3           | 19.9            | 21.2           |
|                                                   | Strong | 4.0           | 2.6           | 3.6           | 3.3           | 2.5           | 3.2           | 4.0           | 4.3           | 5.3           | 5.6            | 5.0             | 5.4            |
| <i>No. of intoxications (N=9,056)</i>             |        |               |               |               |               |               |               |               |               |               |                |                 |                |
| Once or twice                                     |        | 25.8          | 36.7          | 13.4          | 30.1          | 18.4          | 36.7          | 22.3          | 44.1          | 26.2          | 50.7           | 36.3            | 55.3           |
| 3-5 times                                         |        | 26.5          | 32.3          | 20.8          | 30.5          | 21.3          | 34.4          | 33.3          | 36.0          | 32.8          | 29.7           | 31.8            | 28.5           |
| 6-10 times                                        |        | 18.1          | 15.5          | 23.2          | 17.3          | 19.5          | 16.4          | 23.6          | 13.1          | 22.3          | 12.3           | 18.0            | 10.6           |
| 11-25 times                                       |        | 14.2          | 8.6           | 14.2          | 12.4          | 16.0          | 7.6           | 10.5          | 3.9           | 10.4          | 4.5            | 9.0             | 4.9            |
| More than 25 times                                |        | 15.4          | 6.9           | 28.4          | 9.7           | 24.9          | 4.8           | 10.2          | 2.9           | 8.3           | 2.8            | 4.8             | .8             |
| <i>Alcohol abuse disorder symptoms (N=15,288)</i> |        | 36.6          | 21.5          | 42.5          | 19.4          | 33.7          | 18.0          | 34.6          | 23.2          | 37.4          | 24.0           | 28.0            | 16.2           |
| <i>Hazardous drinking (N=15,516)</i>              |        | 29.8          | 13.4          | 23.3          | 7.7           | 18.6          | 6.7           | 16.7          | 10.3          | 19.3          | 9.9            | 12.7            | 5.5            |
| <i>Age at alcohol initiation (N=15,202)</i>       |        | 14.4<br>(1.9) | 14.5<br>(1.7) | 15.1<br>(2.3) | 15.4<br>(2.4) | 15.6<br>(2.6) | 16.4<br>(2.8) | 15.4<br>(2.3) | 16.5<br>(3.0) | 16.2<br>(2.7) | 17.8<br>(4.5)  | 18.1<br>(4.2)   | 20.4<br>(6.8)  |
| <i>Age at onset regular drinking (N=8,638)</i>    |        | 16.7<br>(1.4) | 17.0<br>(1.6) | 18.3<br>(2.9) | 19.4<br>(4.5) | 19.3<br>(4.1) | 22.4<br>(6.1) | 20.6<br>(5.9) | 25.6<br>(9.0) | 22.7<br>(8.4) | 29.5<br>(11.1) | 27.8<br>(12.0)  | 33.3<br>(12.7) |
| <i>Age at first intoxication (N=10,253)</i>       |        | 16.6<br>(1.5) | 16.7<br>(1.5) | 17.6<br>(2.7) | 18.8<br>(3.3) | 18.3<br>(3.1) | 20.8<br>(5.2) | 18.7<br>(3.7) | 22.2<br>(7.0) | 20.6<br>(5.3) | 25.4<br>(8.5)  | 24.3<br>(8.3)   | 32.2<br>(11.0) |
