# Supplementary material for: Increases in alcohol consumption in women and elderly groups: evidence from an epidemiological study
Source: PubMed Central journal article supplement (PMC3720280; doi:10.1186/1471-2458-13-207), 2013-03-08
Supplement: 1471-2458-13-207-S2.pdf [file 1471-2458-13-207-S2.pdf]

**Table A2** Cross-validation of regression ( $\beta$ ) of alcohol use on demographic and lifestyle variables

|                                 | <i>age</i> | <i>sex</i>       | <i>age*sex</i>   | <i>educ.</i><br><i>attainm.</i> | <i>student</i> | <i>wrk stress</i> | <i>fin. stress</i> | <i>urban.</i>     | <i>relig</i> | <i>smoking</i><br><i>initiation</i> | <i>cannabis</i><br><i>initiation</i> | <i>bmi</i> | <i>R</i> <sup>2</sup> |
|---------------------------------|------------|------------------|------------------|---------------------------------|----------------|-------------------|--------------------|-------------------|--------------|-------------------------------------|--------------------------------------|------------|-----------------------|
| Alcohol initiation (N=3,118)    |            |                  |                  |                                 |                |                   |                    |                   |              |                                     |                                      |            |                       |
| A few times to try              | -.20 (.43) | <b>.51 (.20)</b> | .00 (.34)        | .33 (.17)                       | .31 (.20)      | .03 (.21)         | -.08 (.20)         | -.02 (.17)        | -.21 (.16)   | .64 (.17)                           | .19 (.32)                            | .01 (.17)  |                       |
| Yes                             | -.11 (.14) | -.17 (.07)       | .03 (.12)        | .29 (.07)                       | .17 (.08)      | .05 (.09)         | -.06 (.09)         | .10 (.07)         | -.21 (.07)   | .70 (.08)                           | .33 (.13)                            | -.09 (.07) |                       |
| Alcohol frequency (N=3,088)     | .30 (.03)  | -.20 (.02)       | .01 (.03)        | .13 (.02)                       | .10 (.02)      | .02 (.02)         | -.02 (.02)         | -.01 (.02)        | -.05 (.02)   | .18 (.02)                           | .04 (.02)                            | -.08 (.02) | .18                   |
| Alcohol quantity (N=2,592)      | .12 (.03)  | -.26 (.02)       | .04 (.03)        | -.03 (.02)                      | .11 (.02)      | .00 (.02)         | .01 (.02)          | -.04 (.02)        | -.08 (.02)   | .20 (.02)                           | .09 (.02)                            | -.03 (.02) | .16                   |
| Preferred beverage (N=2,820)    |            |                  |                  |                                 |                |                   |                    |                   |              |                                     |                                      |            |                       |
| Wine                            | .63 (.11)  | .71 (.05)        | -.06 (.11)       | .36 (.06)                       | -.07 (.08)     | .14 (.09)         | -.08 (.09)         | -.07 (.07)        | .02 (.07)    | .14 (.07)                           | -.08 (.07)                           | -.09 (.07) |                       |
| Beer                            | -.31 (.13) | -.87 (.04)       | .19 (.14)        | .09 (.09)                       | .02 (.09)      | .15 (.11)         | -.03 (.11)         | <b>-.28 (.07)</b> | -.05 (.08)   | .26 (.08)                           | .08 (.09)                            | .08 (.09)  |                       |
| Strong liquor                   | .01 (.28)  | .26 (.17)        | -.93 (.20)       | -.17 (.15)                      | -.11 (.16)     | .38 (.18)         | -.19 (.18)         | -.18 (.15)        | -.03 (.15)   | .25 (.15)                           | -.38 (.15)                           | .24 (.15)  |                       |
| Urge to drink alcohol           |            |                  |                  |                                 |                |                   |                    |                   |              |                                     |                                      |            |                       |
| Social situations (N=2,951)     | -.17 (.03) | -.12 (.02)       | <b>.08 (.03)</b> | .15 (.02)                       | .08 (.02)      | .01 (.02)         | .04 (.02)          | .02 (.02)         | -.02 (.02)   | .11 (.02)                           | .14 (.02)                            | -.01 (.02) | .12                   |
| At dinner (N=2,934)             | .16 (.04)  | -.04 (.02)       | .09 (.03)        | .18 (.02)                       | .05 (.03)      | -.04 (.03)        | .02 (.03)          | <b>.09 (.02)</b>  | .02 (.02)    | .01 (.02)                           | .08 (.03)                            | -.02 (.02) | .09                   |
| After work (N=2,921)            | -.03 (.04) | -.25 (.03)       | .13 (.04)        | .03 (.03)                       | .03 (.03)      | .02 (.04)         | .03 (.03)          | .02 (.03)         | -.04 (.03)   | .11 (.03)                           | <b>.12 (.03)</b>                     | -.02 (.03) | .12                   |
| When relaxing (N=2,932)         | .01 (.03)  | -.16 (.02)       | .06 (.03)        | -.01 (.02)                      | .02 (.02)      | .05 (.02)         | -.01 (.02)         | <b>-.06 (.02)</b> | .02 (.02)    | .11 (.02)                           | <b>.07 (.02)</b>                     | .01 (.02)  | .06                   |
| Concentrating (N=2,890)         | .24 (.12)  | -.22 (.07)       | -.15 (.11)       | -.01 (.07)                      | .13 (.09)      | -.11 (.09)        | .14 (.08)          | .03 (.07)         | -.01 (.07)   | .19 (.09)                           | -.02 (.07)                           | -.02 (.08) | .13                   |
| Under stress (N=2,896)          | .19 (.04)  | -.04 (.03)       | -.04 (.04)       | .04 (.03)                       | .03 (.03)      | <b>.08 (.03)</b>  | .04 (.03)          | -.03 (.03)        | -.05 (.03)   | .14 (.03)                           | .11 (.03)                            | -.03 (.03) | .08                   |
| No. of intoxications (N=1,815)  | -.07 (.03) | -.25 (.02)       | -.05 (.03)       | .07 (.02)                       | -.04 (.03)     | -.08 (.03)        | <b>.09 (.03)</b>   | .01 (.02)         | -.07 (.02)   | .11 (.02)                           | .23 (.02)                            | .00 (.02)  | .17                   |
| AAD symptoms (N=2,986)          | .04 (.04)  | -.19 (.02)       | .03 (.04)        | .10 (.02)                       | .07 (.03)      | .06 (.03)         | .02 (.03)          | .00 (.02)         | -.05 (.02)   | .19 (.03)                           | .15 (.02)                            | -.02 (.03) | .14                   |
| Hazard. drinking (N=3,001)      | -.09 (.04) | -.22 (.03)       | .05 (.05)        | .03 (.03)                       | .08 (.03)      | .04 (.03)         | .07 (.03)          | -.02 (.03)        | -.06 (.03)   | .22 (.03)                           | .11 (.03)                            | -.03 (.03) | .15                   |
| Age alc. initiation (N=2,948)   | .23 (.03)  | .10 (.02)        | .15 (.03)        | -.06 (.02)                      | -.01 (.02)     | -.04 (.02)        | .01 (.02)          | .05 (.02)         | -.01 (.02)   | -.13 (.02)                          | -.13 (.02)                           | -.03 (.02) | .18                   |
| Age onset reg. drink. (N=1,680) | .31 (.03)  | .18 (.02)        | .23 (.03)        | .01 (.02)                       | .03 (.01)      | -.09 (.02)        | <b>.07 (.03)</b>   | .05 (.02)         | .03 (.02)    | -.02 (.02)                          | -.07 (.02)                           | -.04 (.02) | .29                   |
| Age first intox. (N=2,008)      | .32 (.03)  | .17 (.02)        | .18 (.03)        | -.02 (.02)                      | .03 (.01)      | -.01 (.02)        | -.03 (.02)         | .05 (.02)         | .01 (.02)    | -.08 (.02)                          | -.11 (.02)                           | -.04 (.02) | .24                   |

*Note.*  $\beta$  (beta): standardized regression coefficients, with standard errors in parentheses. Betas in black font were significant at  $\alpha=.01$ . Betas in grey were not significant (at  $\alpha=.01$ ). Betas in bold font were significant (at  $\alpha=.01$ ) in the validation sample but not observed in the main sample.
